# Supplementary material for: p97/VCP is highly expressed in the stem-like cells of breast cancer and controls cancer stemness partly through the unfolded protein response
Source: PubMed Central journal article supplement (PMC7969628; doi:10.1038/s41419-021-03555-5), 2021-03-17
Supplement: 41419_2021_3555_MOESM1_ESM.pdf [file 41419_2021_3555_MOESM1_ESM.pdf]

## Supplementary Tables

| Table S1. Correlation between the levels of p97 and CD44 <sup>+</sup> /CD24 <sup>-</sup> CSC population in breast cancer patients (n = 75). |            |                                         |                                                |                                         |                                         |                                         |                 |
|---------------------------------------------------------------------------------------------------------------------------------------------|------------|-----------------------------------------|------------------------------------------------|-----------------------------------------|-----------------------------------------|-----------------------------------------|-----------------|
|                                                                                                                                             | Expression | CD44 <sup>+</sup><br>/CD24 <sup>-</sup> | non<br>CD44 <sup>+</sup><br>/CD24 <sup>-</sup> | CD44 <sup>-</sup><br>/CD24 <sup>-</sup> | CD44 <sup>-</sup><br>/CD24 <sup>+</sup> | CD44 <sup>+</sup><br>/CD24 <sup>+</sup> | <i>p</i> -value |
| p97                                                                                                                                         | High       | 22                                      | 17                                             | 17                                      | 0                                       | 0                                       | < 0.001         |
|                                                                                                                                             | Low        | 10                                      | 61                                             | 58                                      | 2                                       | 1                                       |                 |
| <i>p</i> -values were calculated using the chi-squared test.                                                                                |            |                                         |                                                |                                         |                                         |                                         |                 |

| Table S2. Correlation between the levels of p97 and SOX2 in breast cancer patients (n = 75). |            |      |      |                 |
|----------------------------------------------------------------------------------------------|------------|------|------|-----------------|
|                                                                                              |            | SOX2 |      |                 |
|                                                                                              | Expression | Low  | High | <i>p</i> -value |
| p97                                                                                          | Low        | 21   | 20   | < 0.001         |
|                                                                                              | High       | 3    | 31   |                 |
| <i>p</i> -values were calculated using the chi-squared test.                                 |            |      |      |                 |

| Table S3. Correlation between the levels of p97 and c-MYC in breast cancer patients (n = 98). |            |       |      |                 |
|-----------------------------------------------------------------------------------------------|------------|-------|------|-----------------|
|                                                                                               |            | c-MYC |      |                 |
|                                                                                               | Expression | Low   | High | <i>p</i> -value |
| p97                                                                                           | Low        | 32    | 9    | < 0.001         |
|                                                                                               | High       | 4     | 53   |                 |
| <i>p</i> -values were calculated using the chi-squared test.                                  |            |       |      |                 |

Table S4. Correlation between the levels of p97 and SKP2 in breast cancer patients (n = 97).

|     | SKP2       |     |      |                 |
|-----|------------|-----|------|-----------------|
|     | Expression | Low | High | <i>p</i> -value |
| p97 | Low        | 37  | 4    | < 0.001         |
|     | High       | 3   | 53   |                 |

*p*-values were calculated using the chi-squared test.
