# Supplementary material for: p97/VCP is highly expressed in the stem-like cells of breast cancer and controls cancer stemness partly through the unfolded protein response
Source: PubMed Central journal article supplement (PMC7969628; doi:10.1038/s41419-021-03555-5), 2021-03-17

**Fig. S2**

**a**

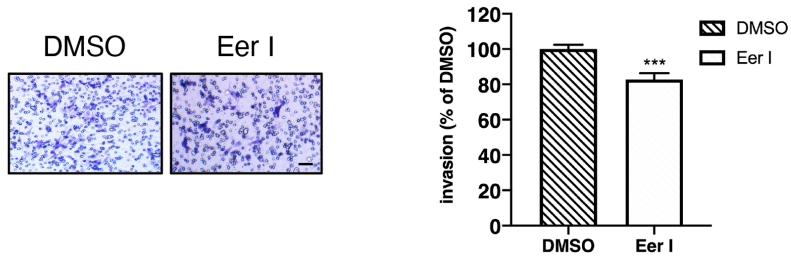

**b**

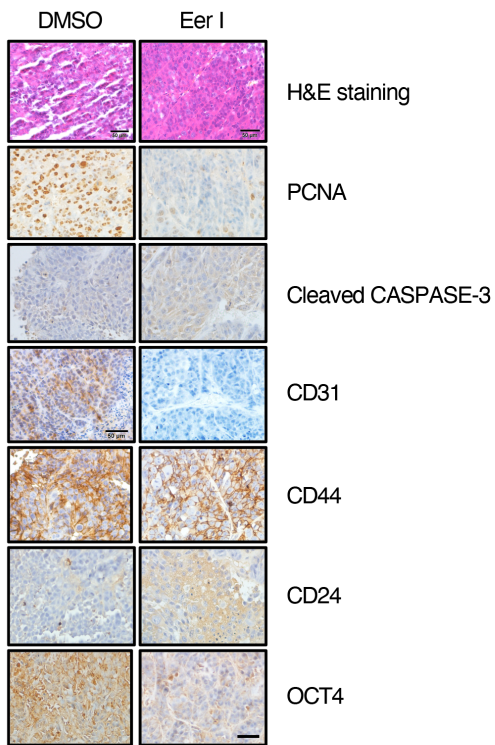

**c**

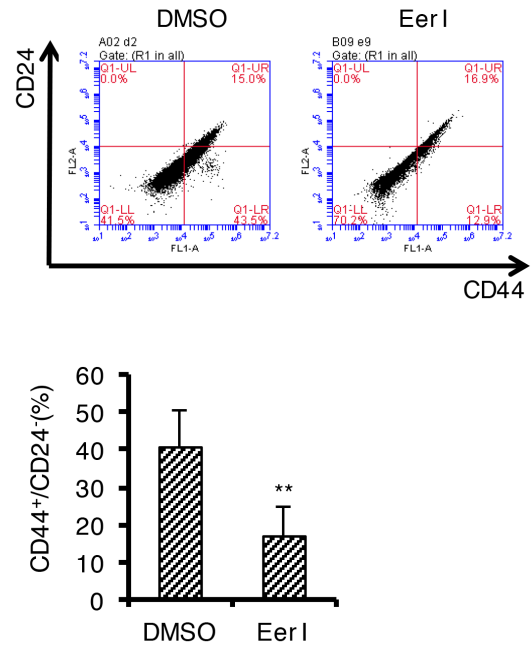

Supplement: 41419_2021_3555_MOESM4_ESM.pdf [file 41419_2021_3555_MOESM4_ESM.pdf]
